# Supplementary material
Source: PubMed Central journal article supplement (PMC3090629)
Supplement: NIHMS216852-supplement-tables_figures.pdf [file NIHMS216852-supplement-tables_figures.pdf]

# A Proximal Bisnitroxide Initiator Effective in Low Temperature Nitroxide Mediated Polymerizations

*Jean Ruehl,<sup>||</sup> Nicole L. Hill,<sup>||</sup> Eric D. Walter, Glenn Millhauser, and Rebecca Braslau\**

<sup>||</sup> These authors contributed equally

Department of Chemistry and Biochemistry, University of California, Santa Cruz,  
California, 95064, USA

## **Contents**

- 1. Low Temperature Polymerization Studies**
- 2. EPR Thermal Homolysis Studies**
- 3. <sup>1</sup>H-NMR Alkoxyamine Decomposition Studies**
- 4. EPR Nitroxide Decomposition Studies**
- 5. Kinetic Equations for the Homolytic Cleavage of a Bisalkoxyamine**

## 1. Low Temperature Polymerization Studies

**SI Table 1.** Polymerizations of Styrene and *t*-Butyl Acrylate with Bisalkoxyamine **1**  
at 110 °C

| entry | monomer <sup>a</sup>     | time  |                     | $M_{n,NMR}^c$ | $M_{n,GPC}^d$ | PDI <sup>e</sup> |
|-------|--------------------------|-------|---------------------|---------------|---------------|------------------|
|       |                          | (min) | % conv <sup>b</sup> | (g/mol)       | (g/mol)       |                  |
| 1     | St                       | 180   | 54                  | 11,900        | 12,900        | 1.17             |
| 2     | <i>t</i> BA <sup>f</sup> | 210   | 39                  | 10,600        | 9,800         | 1.32             |
| 3     | <i>t</i> BA <sup>f</sup> | 45    | 10                  | 1,900         | 400           | 3.21             |
| 4     | <i>t</i> BA <sup>f</sup> | 60    | 9                   | 1,900         | 500           | 3.13             |
| 5     | <i>t</i> BA <sup>f</sup> | 75    | 11                  | 2,000         | 700           | 3.20             |
| 6     | <i>t</i> BA <sup>f</sup> | 90    | 15                  | 2,500         | 900           | 2.57             |
| 7     | <i>t</i> BA <sup>f</sup> | 105   | 24                  | 3,700         | 3,700         | 1.45             |
| 8     | <i>t</i> BA <sup>f</sup> | 120   | 26                  | 3,900         | 3,700         | 1.45             |

<sup>a</sup> 200 equiv used for entries 1 and 2, all other entries 100 equiv used. <sup>b</sup> Calculated from <sup>1</sup>H NMR integration. <sup>c</sup> Theoretical molecular weight calculated from percent conversion determined by <sup>1</sup>H NMR. <sup>d</sup> Number-average molecular weight measured by GPC. <sup>e</sup> Polydispersity index ( $M_w/M_n$ ) from GPC. <sup>f</sup> 5% of bisnitroxide **3** was added (St = styrene, *t*BA = *t*-butyl acrylate).

**SI Table 2.** Polymerizations of Styrene, *t*-Butyl Acrylate, and *n*-Butyl Acrylate with Bisalkoxyamine **1** at 90 °C and 70 °C

| entry | monomer <sup>a</sup>     | temp (°C) | time (hours) | % conv <sup>b</sup> | $M_{n,NMR}^c$ (g/mol) | $M_{n,GPC}^d$ (g/mol) | PDI <sup>e</sup> |
|-------|--------------------------|-----------|--------------|---------------------|-----------------------|-----------------------|------------------|
| 9     | St                       | 90        | 92           | 88                  | 19,100                | 20,300                | 1.16             |
| 10    | <i>t</i> BA <sup>f</sup> | 90        | 92           | 71                  | 18,800                | 20,900                | 1.38             |
| 11    | St                       | 70        | 119          | 33                  | 7,500                 | 8,000                 | 1.24             |
| 12    | <i>t</i> BA <sup>f</sup> | 70        | 119          | 17                  | 5,100                 | 7,800                 | 1.43             |
| 13    | <i>n</i> BA <sup>f</sup> | 70        | 119          | 13                  | 4,000                 | 3,200                 | 1.48             |

<sup>a</sup> 200 equiv used. <sup>b</sup> Calculated from <sup>1</sup>H NMR integration. <sup>c</sup> Theoretical molecular weight calculated from percent conversion determined by <sup>1</sup>H NMR. <sup>d</sup> Number-average molecular weight measured by GPC. <sup>e</sup> Polydispersity index ( $M_w/M_n$ ) from GPC. <sup>f</sup> 5% of bisnitroxide **3** was added (St = styrene, *t*BA = *t*-butyl acrylate, *n*BA = *n*-butyl acrylate).

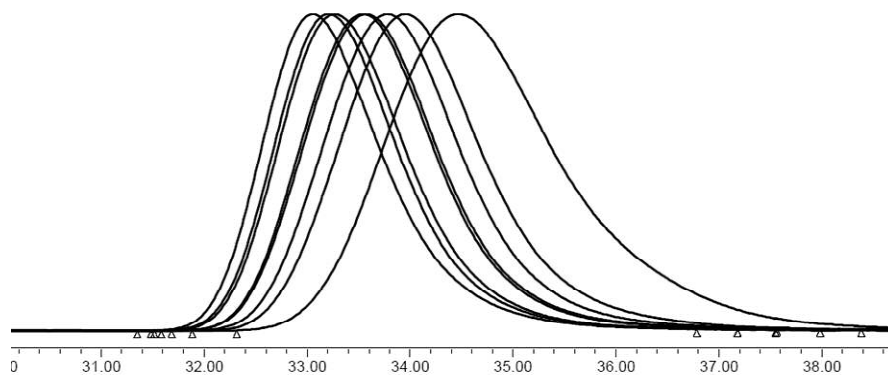

**SI Figure 1:** Time study GPC traces for polystyrene using initiator **1**. Percent conversions based on <sup>1</sup>H NMR data are (beginning from the right to left) 30, 45, 45, 45, 56, 69, 61, and 65. Each polymerization was run with 600 equivalents of styrene at 70 °C.

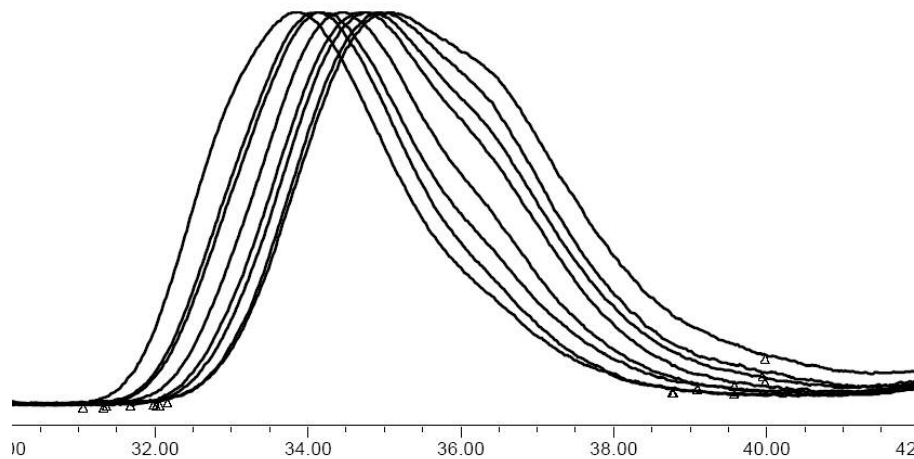

**SI Figure 2:** Time study GPC traces for poly(*t*-butylacrylate) using initiator **1**. Percent conversions based on  $^1\text{H}$  NMR data are (beginning from the right to left) 10, 10, 11, 16, 17, 20, 17, and 24. Each polymerization was run with 600 equivalents of *t*-butylacrylate at 70 °C.

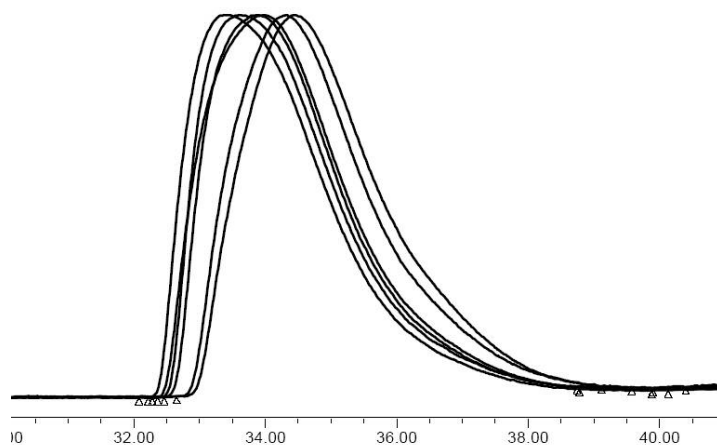

**SI Figure 3:** Time study GPC traces for poly(dimethylacrylamide) using initiator **1**. Percent conversions based on  $^1\text{H}$  NMR data are (beginning from the right to left) 41, 38, 47, 55, 57, and 69. Each polymerization was run with 600 equivalents of dimethylacrylamide at 70 °C.

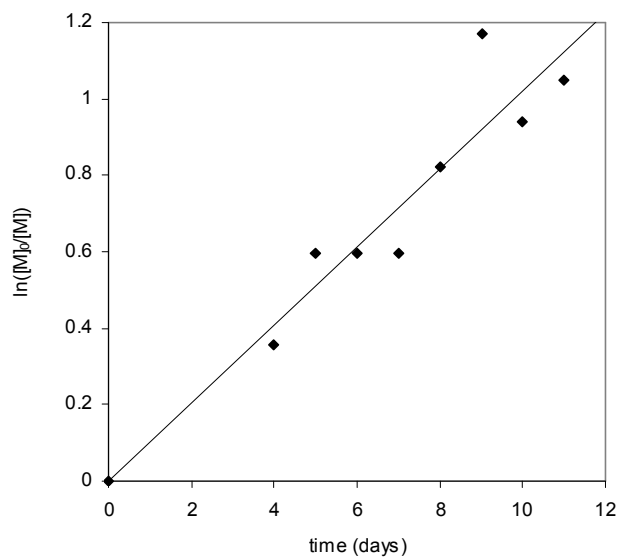

**SI Figure 4.** Styrene polymerization with initiator **1** at 70 °C.

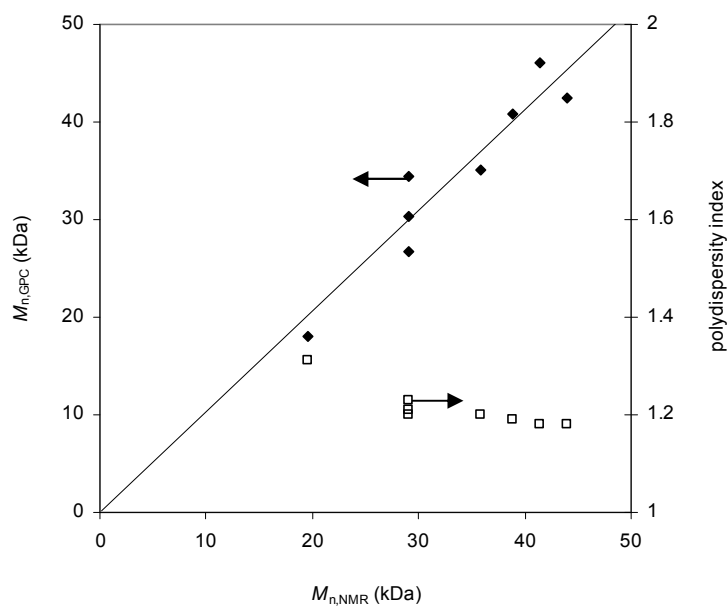

**SI Figure 5.** Evolution of  $M_{n,GPC}$  (molecular weight determined by GPC) and polydispersity index ( $M_w/M_n$ ) as a function of  $M_{n,NMR}$  (molecular weight calculated from  $^1\text{H-NMR}$ ) for the polymerization of styrene at 70 °C with bidirectional initiator **1**.

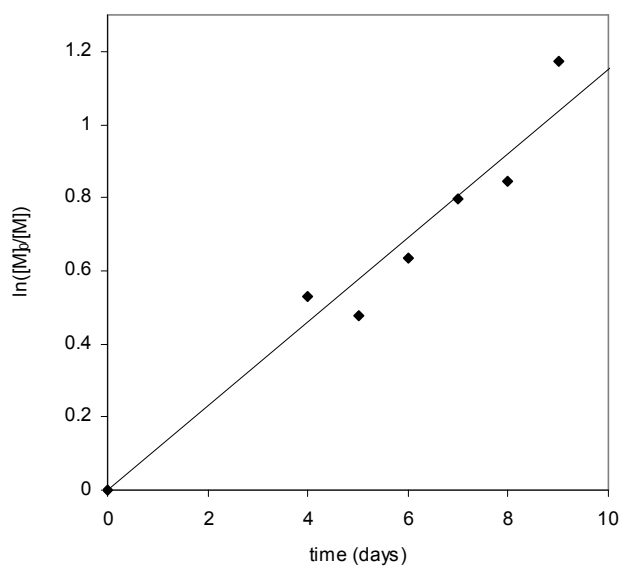

**SI Figure 6.** Dimethylacrylamide polymerization with bisalkoxyamine initiator **1** at 70 °C.

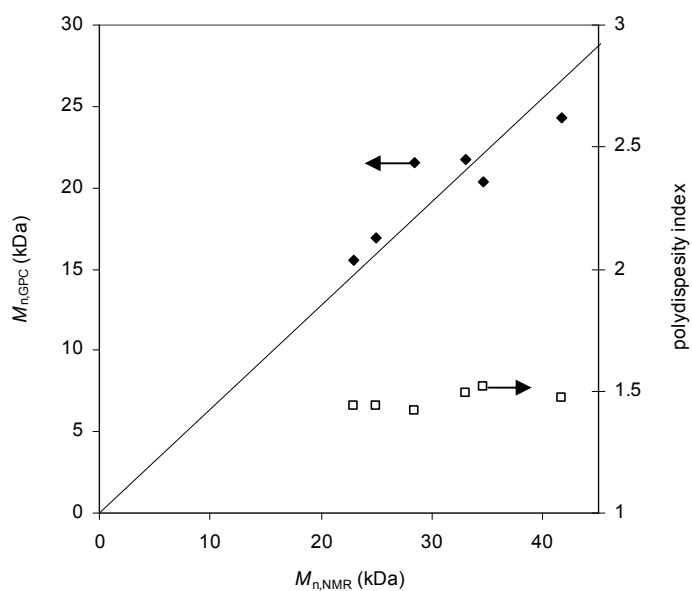

**SI Figure 7.** Evolution of  $M_{n,GPC}$  (molecular weight determined by GPC) and polydispersity index ( $M_w/M_n$ ) as a function of  $M_{n,NMR}$  (molecular weight calculated from  $^1\text{H-NMR}$ ) for the polymerization of dimethylacrylamide at 70 °C with bidirectional initiator **1**.

**SI Table 3.** Preparation of A and ABA Triblock Copolymers at 70 °C

|              |                                                         | time   | $M_{n,NMR}^a$ | $M_{n,GPC}^b$ |                  |
|--------------|---------------------------------------------------------|--------|---------------|---------------|------------------|
|              |                                                         | (days) | (g/mol)       | (g/mol)       | PDI <sup>c</sup> |
| A block      | P <i>t</i> BA                                           | 5      | 4,300         | 4,100         | 1.57             |
| ABA triblock | P <i>t</i> BA-PS <sup>d</sup> -P <i>t</i> BA            | 6      | 11,300        | 22,300        | 1.29             |
| A block      | P <i>n</i> BA                                           | 5      | 6,700         | 5,000         | 1.59             |
| ABA triblock | P <i>n</i> BA-P <i>t</i> BA <sup>d</sup> -P <i>n</i> BA | 6      | 10,000        | 7,600         | 1.49             |

<sup>a</sup> Theoretical molecular weight calculated from percent conversion determined by <sup>1</sup>H NMR integration. <sup>b</sup> Number-average molecular weight measured by GPC. <sup>c</sup> Polydispersity index ( $M_w/M_n$ ) from GPC. <sup>d</sup> 400 equivalents used (St = styrene, *t*BA = *t*-butyl acrylate, *n*BA = *n*-butyl acrylate).

## 2. EPR Thermal Homolysis Studies

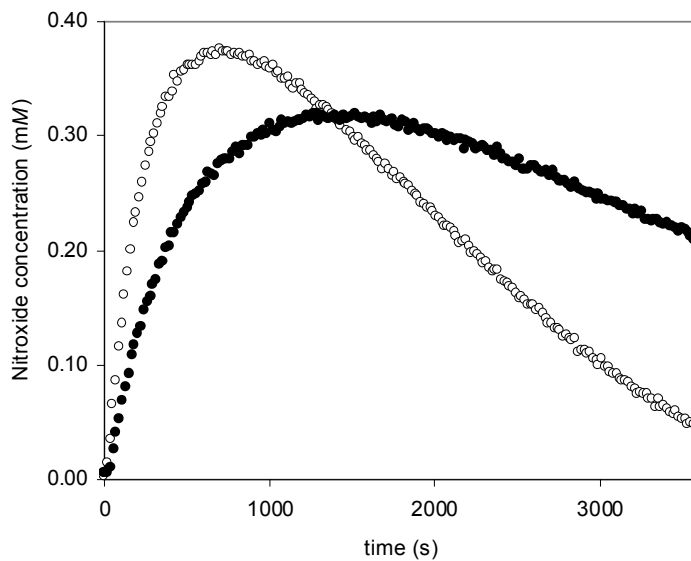

**SI Figure 8.** Nitroxide concentration measured by EPR as a function of time for the homolysis of bisalkoxyamine initiator **1** (○) and parent alkoxyamine initiator **2** (●) when heated at 378 K in the presence of oxygen.

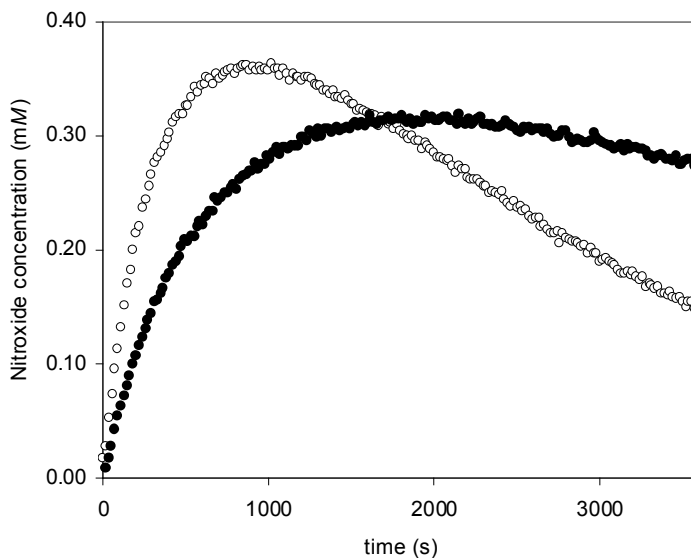

**SI Figure 9.** Nitroxide concentration measured by EPR as a function of time for the homolysis of bisalkoxyamine initiator **1** (○) and parent alkoxyamine initiator **2** (●) when heated at 373 K in the presence of oxygen.



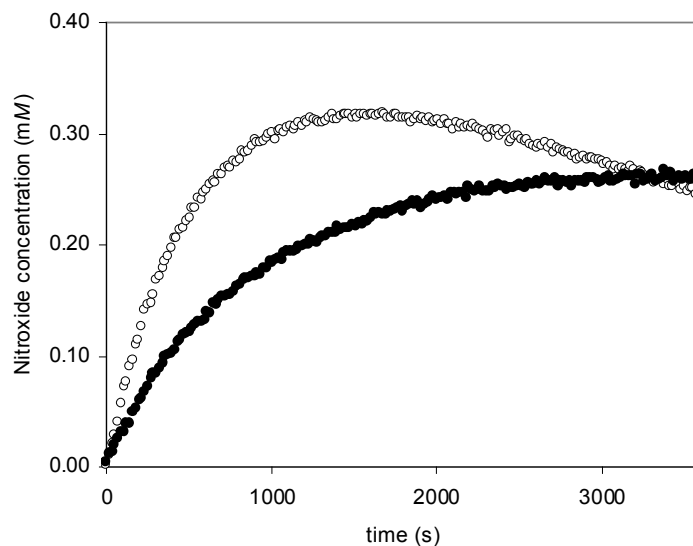

**SI Figure 10.** Nitroxide concentration measured by EPR as a function of time for the homolysis of bisalkoxyamine initiator **1** (○) and parent alkoxyamine initiator **2** (●) when heated at 368 K in the presence of oxygen.

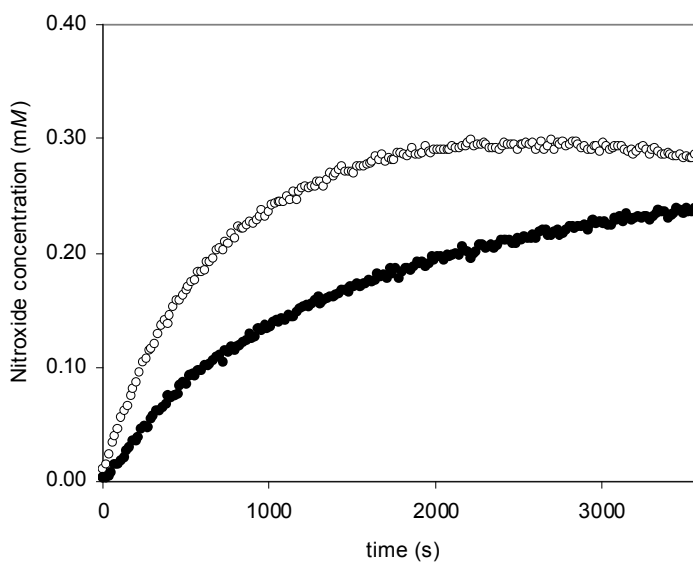

**SI Figure 11.** Nitroxide concentration measured by EPR as a function of time for the homolysis of bisalkoxyamine initiator **1** (○) and parent alkoxyamine initiator **2** (●) when heated at 363 K in the presence of oxygen.

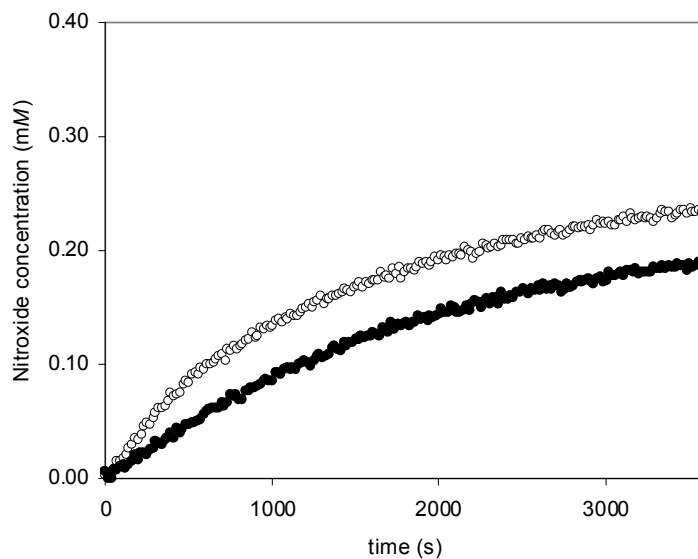

**SI Figure 12.** Nitroxide concentration measured by EPR as a function of time for the homolysis of bisalkoxyamine initiator **1** (○) and parent alkoxyamine initiator **2** (●) when heated at 358 K in the presence of oxygen.

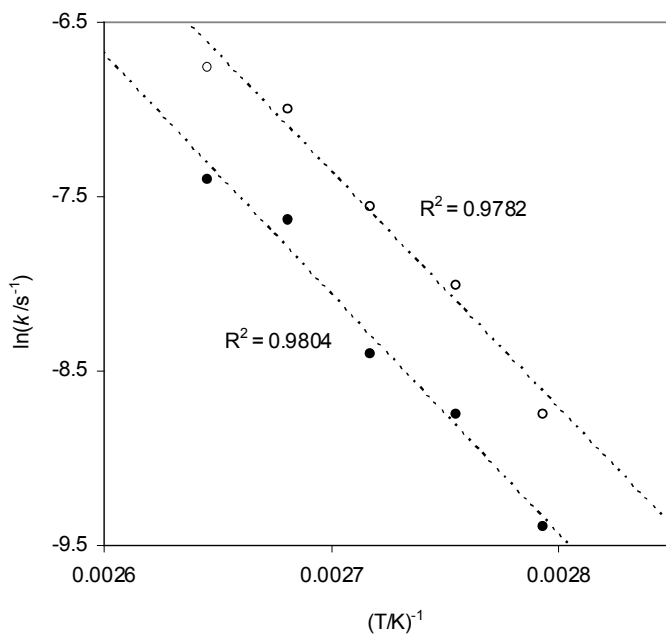

**SI Figure 13.** Arrhenius plot for the homolytic cleavage of bisalkoxyamine **1**(○) and mono alkoxyamine **2** (●).

### 3. $^1\text{H-NMR}$ Alkoxyamine Decomposition Studies

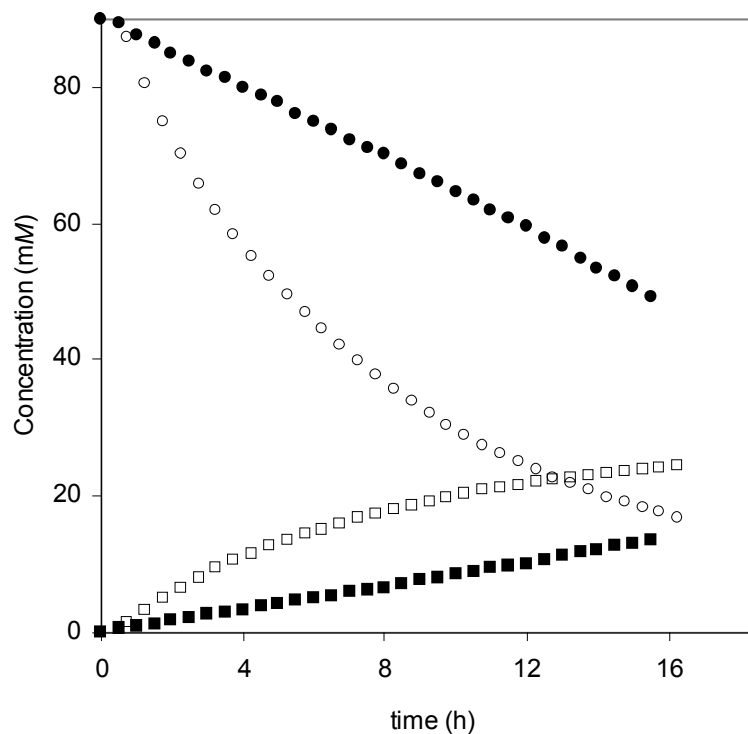

**SI Figure 14.** Alkoxyamine (A) and styrene (S) concentrations as a function of time when 90mM solutions of alkoxyamine **2** (● = [A]; ■ = [S]) and TEMPO-based alkoxyamine **5** (○ = [A]; □ = [S]) were heated at 125 °C in *p*-xylene-*d*<sub>10</sub>. Concentrations were calculated from  $^1\text{H-NMR}$  integration values.

#### 4. EPR Nitroxide Decomposition Studies

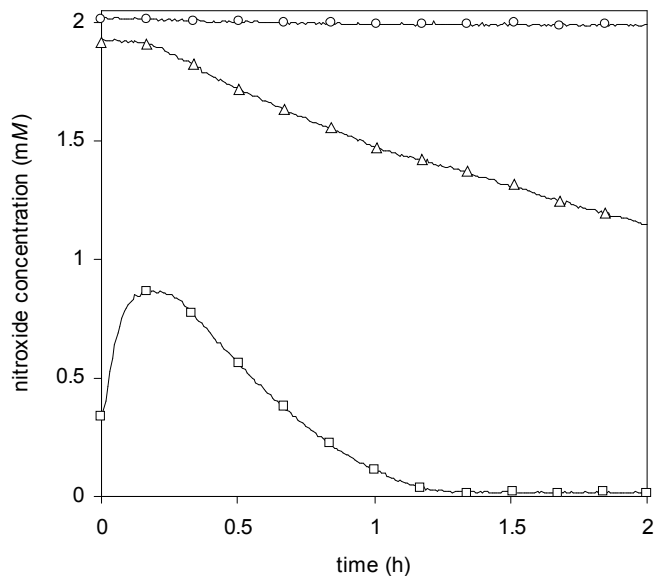

**SI Figure 15.** Variation of nitroxide concentration with time upon heating of bisnitroxide **3** ( $\square$ ), mononitroxide **4** ( $\triangle$ ), and TEMPO ( $\circ$ ) at 120 °C. Scans were taken every 30 to 60 seconds; only selected data points are shown for clarity. Nitroxide samples **3** and **4** were synthesized, flashed, and stored in *t*-butyl benzene (2 mM nitroxide concentration) at 0 °C for 1 day prior to use.

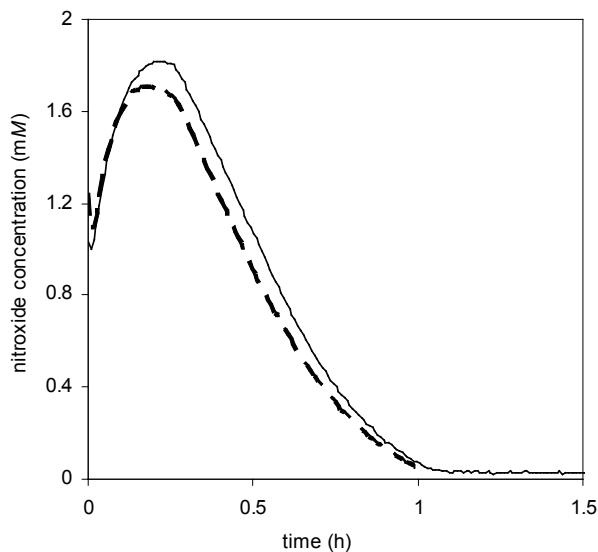

**SI Figure 16.** Variation of nitroxide concentration with time upon heating a 4.0 mM solution of bisnitroxide **3** in *t*-butylbenzene at 120 °C. Bisnitroxide samples for trial 1 (— —) and trial 2 (——) were synthesized separately.

## 5. Kinetic Equations for the Homolytic Cleavage of Mono- and Bisalkoxyamine

The dissociation of a monoalkoxyamine, A, into a nitroxide N• and a transient radical P• is shown in equation SI.1.

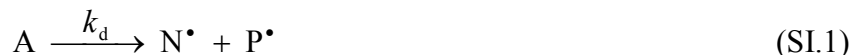

The first order integrated rate law for this reaction is

$$\ln\left(\frac{[A]_0 - [N]}{[A]_0}\right) = -k_d t \quad (\text{SI.2})$$

Eventually, all of the alkoxyamine turns into nitroxide, so  $[A]_0$  is equal to  $[N]_\infty$  and equation SI.2 can be written as the plateau method (equation SI.3).

$$\ln\left(\frac{[N]_\infty - [N]}{[N]_\infty}\right) = -k_d t \quad (\text{SI.3})$$

When the nitroxide undergoes thermal decomposition, equation SI.3 cannot be used. Instead, the initial slope method (equation SI.4) is used.

$$k_d = \frac{\left(\frac{d[N]}{dt}\right)_{t=0}}{[A]_0} \quad (\text{SI.4})$$

The dissociation of a bisalkoxyamine occurs in two steps. There are two possible transient radicals that can dissociate from the bisalkoxyamine AA, hence the rate constant  $2k_d$ . Once the monoalkoxyamine AN• forms, there is only one possible transient radical that can dissociate, so the rate constant in equation SI.6 is only  $k_d$ . This assumes that the dissociation of the second radical is independent of the dissociation of the first radical.

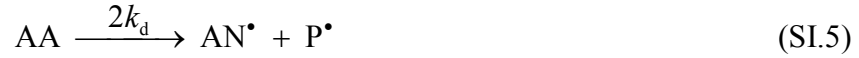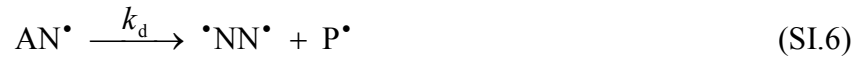

The rate laws for  $AN^\bullet$  and  $\bullet NN^\bullet$  are

$$\frac{d[AN^\bullet]}{dt} = 2k_d[AA] - k_d[AN^\bullet] \quad (SI.7)$$

$$\frac{d[\bullet NN^\bullet]}{dt} = k_d[AN^\bullet] \quad (SI.8)$$

In the EPR analysis of this reaction, it is the *total* concentration of nitroxide functionalities,  $[N]$ , that is physically measured. Each  $AN^\bullet$  species contains one nitroxide functionality, and each  $\bullet NN^\bullet$  species contains two nitroxide functionalities, to give

$$[N] = [AN^\bullet] + 2[\bullet NN^\bullet] \quad (SI.9)$$

Taking the derivative of equation SI.9 with respect to time gives

$$\frac{d[N]}{dt} = \frac{d[AN^\bullet]}{dt} + 2\frac{d[\bullet NN^\bullet]}{dt} \quad (SI.10)$$

and substituting in equations SI.7 and SI.8 gives

$$\frac{d[N]}{dt} = 2k_d[AA] + k_d[AN^\bullet] \quad (SI.11)$$

From the stoichiometry of the reaction,  $[AA] = [AA]_0 - [AN^\bullet] - [\bullet NN^\bullet]$ , and equation SI.11 can be rewritten as

$$\frac{d[N]}{dt} = 2k_d([AA]_0 - [AN^{\bullet}] - [^{\bullet}NN^{\bullet}]) + k_d[AN^{\bullet}] \quad (\text{SI.12})$$

which simplifies to

$$\frac{d[N]}{dt} = k_d(2[AA]_0 - [N]) \quad (\text{SI.13})$$

This first order rate law is integrated to give

$$\ln\left(\frac{2[AA]_0 - [N]}{2[AA]_0}\right) = -k_d t \quad (\text{SI.14})$$

Because each bisalkoxyamine eventually forms two nitroxide moieties,  $2[AA]_0$  is equal to  $[N]_{\infty}$ , and equation SI.14 reduces to the same equation that is used in the plateau method for monoalkoxyamines (equation SI.3) For nitroxides that undergo thermal decomposition, equation SI.14 cannot be used. Instead, equation SI.13 is evaluated at time  $t = 0$  to give the initial slope equation for  $k_d$ .

$$k_d = \frac{\left(\frac{d[N]}{dt}\right)_{t=0}}{2[AA]_0} \quad (\text{SI.15})$$

Because  $2[AA]$  is equal to the concentration of *alkoxyamine functionality*, equation SI.15 reduces to the same equation that is used in the initial slope method for monoalkoxyamines (equation SI.4), where  $[A]_0$  = the initial concentration of alkoxyamine functionality.

The above derivation assumes that the dissociation of the second nitroxide moiety occurs at the same rate as the dissociation of the first nitroxide moiety. This may not be the case,

and a more general form of the dissociation reaction for a bisalkoxyamine is given by equations SI.16 and SI.17.

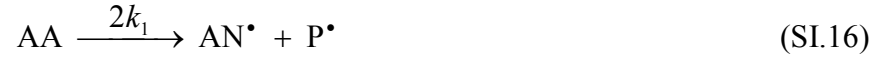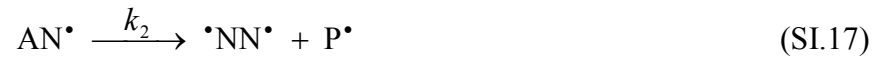

Equation SI.10 can be rewritten as

$$\frac{d[N]}{dt} = 2k_1[AA] + k_2[AN^\bullet] \quad (\text{SI.18})$$

and evaluating this equation at  $t = 0$  gives

$$k_1 = \frac{\left(\frac{d[N]}{dt}\right)_{t=0}}{2[AA]_0} \quad (\text{SI.19})$$

because  $[AN^\bullet] = 0$  at  $t = 0$ . Equation SI.19 is the same as equation SI.15, except that the rate constant which is measured by this initial slope method is  $k_1$ .
